# Supplementary material for: Discontinuation of Oral Anticoagulants in Atrial Fibrillation Patients: Impact of Treatment Strategy and on Patients’ Health Status
Source: MDPI journal article supplement (doi:10.3390/jcm12247712), 2023-12-15
Supplement: s1 [file s1]

## **Supplemental Material**

### **Discontinuation of Oral Anticoagulants in Atrial Fibrillation Patients: Impact of Treatment Strategy and on Patients' Health Status**

**Table S1.** Comparison of patient characteristics between continuation and discontinuation of OAC in the ablation group

**Table S2.** Comparison of patient characteristics between continuation and discontinuation of OAC in the antiarrhythmic drugs group

**Table S3.** Comparison of patient characteristics between continuation and discontinuation of OAC in the rate control group

**Table S4.** Crude incidence of adverse clinical events during 2 years after registration

**Table S5.** Association OAC discontinuation and clinical adverse events during 2 years after registration

**Table S1. Comparison of patient characteristics between continuation and discontinuation of OAC in the ablation group**

|                                                 | <b>Continuation<br/>(n=239)</b> | <b>Discontinuation<br/>(n=252)</b> | <b>P-<br/>Value</b> |
|-------------------------------------------------|---------------------------------|------------------------------------|---------------------|
| Age, years                                      | 69.5 (7.5)                      | 70.2 (7.9)                         | 0.32                |
| Female                                          | 75 (31.4%)                      | 70 (27.8%)                         | 0.44                |
| Body mass index, kg/m <sup>2</sup>              | 24.0 (3.5)                      | 23.8 (3.5)                         | 0.35                |
| Hemoglobin, g/dL                                | 14.3 (1.6)                      | 14.0 (1.6)                         | 0.13                |
| eGFR, mL/min/1.73m <sup>2</sup>                 | 60.1 (13.7)                     | 60.5 (15.7)                        | 0.80                |
| <b>Type of AF</b>                               |                                 |                                    |                     |
| First detected                                  | 4 (1.7%)                        | 5 (2.0%)                           |                     |
| Paroxysmal                                      | 116 (48.5%)                     | 167 (66.3%)                        |                     |
| Persistent                                      | 82 (34.3%)                      | 64 (25.4%)                         | <0.001              |
| Permanent                                       | 35 (14.6%)                      | 16 (6.3%)                          |                     |
| Unknown                                         | 2 (0.8%)                        | 0                                  |                     |
| <b>Comorbidities</b>                            |                                 |                                    |                     |
| Heart failure                                   | 42 (17.6%)                      | 25 (9.9%)                          | 0.019               |
| Hypertension                                    | 196 (82.0%)                     | 208 (82.5%)                        | 0.97                |
| Diabetes                                        | 58 (24.3%)                      | 53 (21.0%)                         | 0.45                |
| Previous Stroke                                 | 55 (23.0%)                      | 22 (8.7%)                          | <0.001              |
| Coronary artery disease                         | 24 (10.0%)                      | 20 (7.9%)                          | 0.51                |
| Previous cerebral                               | 6 (2.5%)                        | 2 (0.8%)                           | 0.25                |
| bleeding                                        |                                 |                                    |                     |
| Previous GI bleeding                            | 1 (0.4%)                        | 3 (1.2%)                           | 0.65                |
| <b>CHA<sub>2</sub>DS<sub>2</sub>-Vasc score</b> |                                 |                                    |                     |
| Mean score                                      | 3.2 (1.1)                       | 2.9 (1.0)                          | <0.001              |
| 7-9                                             | 1 (0.4%)                        | 1 (0.4%)                           | <0.001              |
| 4-6                                             | 88 (36.8%)                      | 56 (22.2%)                         |                     |
| 3                                               | 74 (31.0%)                      | 85 (33.7%)                         |                     |
| 2                                               | 76 (31.8%)                      | 110 (43.7%)                        |                     |

|                               |             |             |        |
|-------------------------------|-------------|-------------|--------|
| mHAS_BLED score               | 2 (1-2)     | 2 (1-2)     | 0.85   |
| <b>Echocardiographic data</b> |             |             |        |
| LVDD, cm                      | 4.7 (0.6)   | 4.6 (0.6)   | 0.26   |
| LVEF, %                       | 62.4 (11.8) | 63.7 (8.9)  | 0.18   |
| Left atrium diameter, cm      | 4.2 (0.8)   | 3.9 (0.7)   | <0.001 |
| <b>Medications</b>            |             |             |        |
| DOAC                          | 182 (76.2%) | 230 (91.3%) | <0.001 |
| Warfarin                      | 57 (23.8%)  | 22 (8.7%)   |        |
| Antiplatelet therapy          | 30 (12.6%)  | 34 (13.5%)  | 0.86   |
| β-blocker                     | 139 (58.2%) | 138 (54.8%) | 0.50   |
| ACE-I/ARB                     | 124 (51.9%) | 123 (48.8%) | 0.56   |
| Ca-blocker                    | 132 (55.2%) | 141 (56.0%) | 0.94   |
| Digoxin                       | 13 (5.4%)   | 5 (2.0%)    | 0.07   |
| <b>AFEQT-OS score</b>         |             |             |        |
| <b>Baseline</b>               |             |             |        |
| Overall summary               | 74.1 (18.5) | 74.6 (18.9) | 0.78   |
| Symptoms                      | 76.0 (20.2) | 74.5 (21.9) | 0.43   |
| Daily activities              | 73.5 (22.7) | 75.3 (22.7) | 0.40   |
| Treatment satisfactions       | 62.9 (21.2) | 65.9 (20.3) | 0.16   |
| Treatment concerns            | 72.8 (19.4) | 73.9 (19.3) | 0.54   |
| <b>1-year</b>                 |             |             |        |
| Overall summary               | 86.9 (13.0) | 89.2 (13.3) | 0.06   |
| Symptoms                      | 89.2 (14.6) | 90.1 (15.0) | 0.50   |
| Daily activities              | 85.8 (16.2) | 88.1 (16.1) | 0.12   |
| Treatment satisfactions       | 81.0 (21.0) | 88.3 (15.2) | <0.001 |
| Treatment concerns            | 86.9 (13.7) | 89.8 (13.2) | 0.019  |

Values are mean (SD), median (IQR), or n (%). ACE-I, angiotensin converting enzyme inhibitor; AF, atrial fibrillation; AFEQT, Atrial Fibrillation Effect on Quality-of-Life; ARB, angiotensin receptor blocker; BNP, brain natriuretic peptide; DOAC, direct oral anticoagulant; eGFR, estimated glomerular filtration rate; GI, gastrointestinal; LVDD, left ventricular end-diastolic dimension; LVEF, left ventricular ejection fraction; mHAS-BLED; modified HAS-BLED.

**Table S2. Comparison of patient characteristics between continuation and discontinuation of OAC in the antiarrhythmic drugs group**

|                                              | Continuation<br>(n=182) | Discontinuation<br>(n=82) | P-<br>Value |
|----------------------------------------------|-------------------------|---------------------------|-------------|
| Age, years                                   | 74.2 (8.1)              | 70.7 (8.2)                | 0.002       |
| Female                                       | 66 (36.3%)              | 20 (24.4%)                | 0.37        |
| Body mass index, kg/m <sup>2</sup>           | 24.0 (3.7)              | 23.9 (4.4)                | 0.31        |
| Family history of AF                         | 67 (15.9%)              | 58 (17.4%)                | 0.86        |
| Hemoglobin, g/dL                             | 13.4 (1.6)              | 13.2 (1.4)                | 0.24        |
| eGFR, mL/min/1.73m <sup>2</sup>              | 58.3 (17.4)             | 62.1 (14.6)               | 0.09        |
| Type of AF                                   |                         |                           |             |
| First detected                               | 10 (5.5%)               | 3 (3.7%)                  | 0.35        |
| Paroxysmal                                   | 112 (61.5%)             | 54 (65.9%)                |             |
| Persistent                                   | 46 (25.3%)              | 23 (28.0%)                |             |
| Permanent                                    | 14 (7.7%)               | 2 (2.4%)                  |             |
| Unknown                                      | 0                       | 0                         |             |
| Comorbidities                                |                         |                           |             |
| Heart failure                                | 34 (18.7%)              | 20 (24.4%)                | 0.37        |
| Hypertension                                 | 133 (73.1%)             | 61 (74.4%)                | 0.94        |
| Diabetes                                     | 45 (24.7%)              | 20 (24.4%)                | >0.99       |
| Previous Stroke                              | 25 (13.7%)              | 9 (11.0%)                 | 0.67        |
| Coronary artery disease                      | 18 (9.9%)               | 8 (9.8%)                  | >0.99       |
| Previous cerebral<br>bleeding                | 4 (2.2%)                | 1 (1.2%)                  | 0.96        |
| Previous GI bleeding                         | 5 (2.7%)                | 1 (1.2%)                  | 0.75        |
| CHA <sub>2</sub> DS <sub>2</sub> -Vasc score |                         |                           |             |
| Mean score                                   | 3.3 (1.2)               | 3.0 (1.1)                 | <0.001      |
| 7-9                                          | 4 (2.2%)                | 3 (3.6%)                  | 0.13        |
| 4-6                                          | 72 (39.6%)              | 21 (25.6%)                |             |
| 3                                            | 55 (30.2%)              | 34 (41.5%)                |             |

|                               |             |             |        |
|-------------------------------|-------------|-------------|--------|
| 2                             | 51 (28.0%)  | 24 (29.3%)  |        |
| mHAS_BLED score               | 2 (1-2)     | 2 (1-2)     | 0.35   |
| <b>Echocardiographic data</b> |             |             |        |
| LVDD, cm                      | 4.6 (0.6)   | 4.6 (0.6)   | 0.91   |
| LVEF, %                       | 64.7 (10.2) | 63.3 (8.8)  | 0.29   |
| Left atrium diameter, cm      | 4.2 (0.7)   | 3.9 (0.6)   | <0.001 |
| <b>Medications</b>            |             |             |        |
| DOAC                          | 149 (81.9%) | 68 (82.9%)  | 0.97   |
| Warfarin                      | 33 (18.1%)  | 14 (17.1%)  |        |
| Antiplatelet therapy          | 31 (17.0%)  | 10 (12.2%)  | 0.41   |
| β-blocker                     | 101 (55.5%) | 40 (48.8%)  | 0.38   |
| ACE-I/ARB                     | 88 (48.4%)  | 31 (37.8%)  | 0.14   |
| Ca-blocker                    | 96 (52.7%)  | 39 (47.6%)  | 0.52   |
| Digoxin                       | 7 (3.8%)    | 0           | 0.17   |
| Pilsicainide                  | 28 (15.4%)  | 6 (7.3%)    | 0.11   |
| Flecainide                    | 10 (5.5%)   | 3 (3.7%)    | 0.74   |
| Cibenzoline                   | 13 (7.1%)   | 2 (2.4%)    | 0.22   |
| Bepridil                      | 18 (9.9%)   | 10 (12.2%)  | 0.73   |
| <b>AFEQT-OS score</b>         |             |             |        |
| <b>Baseline</b>               |             |             |        |
| Overall summary               | 74.1 (18.5) | 76.6 (19.2) | 0.32   |
| Symptoms                      | 78.5 (21.5) | 81.4 (19.8) | 0.31   |
| Daily activities              | 70.6 (24.6) | 75.1 (23.1) | 0.16   |
| Treatment satisfactions       | 67.9 (18.1) | 76.6 (18.3) | 0.001  |
| Treatment concerns            | 75.7 (17.6) | 75.5 (20.2) | 0.95   |
| <b>1-year</b>                 |             |             |        |
| Overall summary               | 79.2 (16.8) | 86.6 (12.9) | 0.001  |
| Symptoms                      | 83.1 (17.6) | 88.9 (16.8) | 0.018  |
| Daily activities              | 76.1 (21.6) | 84.7 (16.7) | 0.003  |
| Treatment satisfactions       | 73.7 (18.3) | 84.8 (16.9) | <0.001 |
| Treatment concerns            | 80.8 (16.7) | 87.4 (13.8) | 0.003  |

Values are mean (SD), median (IQR), or n (%). ACE-I, angiotensin converting enzyme

inhibitor; AF, atrial fibrillation; AFEQT, Atrial Fibrillation Effect on Quality-of-Life; ARB, angiotensin receptor blocker; BNP, brain natriuretic peptide; DOAC, direct oral anticoagulant; eGFR, estimated glomerular filtration rate; GI, gastrointestinal; LVDD, left ventricular end-diastolic dimension; LVEF, left ventricular ejection fraction; mHAS-BLED; modified HAS-BLED; OAC oral anticoagulant.

**Table S3. Comparison of patient characteristics between continuation and discontinuation of OAC in the rate control group**

|                                              | Continuation<br>(n=841) | Discontinuation<br>(n=51) | P-<br>Value |
|----------------------------------------------|-------------------------|---------------------------|-------------|
| Age, years                                   | 75.2 (8.0)              | 75.8 (7.0)                | 0.57        |
| Female                                       | 317 (37.7%)             | 17 (33.3%)                | 0.63        |
| Body mass index, kg/m <sup>2</sup>           | 23.5 (3.9)              | 22.3 (3.0)                | 0.027       |
| Hemoglobin, g/dL                             | 13.4 (1.8)              | 12.9 (2.0)                | 0.042       |
| eGFR, mL/min/1.73m <sup>2</sup>              | 57.5 (17.1)             | 54.9 (19.0)               | 0.31        |
| Type of AF                                   |                         |                           |             |
| First detected                               | 58 (7.0%)               | 6 (11.8%)                 | 0.73        |
| Paroxysmal                                   | 265 (31.8%)             | 16 (31.4%)                |             |
| Persistent                                   | 227 (27.2%)             | 12 (23.5%)                |             |
| Permanent                                    | 260 (31.2%)             | 15 (29.4%)                |             |
| Unknown                                      | 24 (2.9%)               | 2 (3.9%)                  |             |
| Comorbidities                                |                         |                           |             |
| Heart failure                                | 317 (37.3%)             | 17 (33.3%)                | 0.63        |
| Hypertension                                 | 626 (74.4%)             | 40 (78.4%)                | 0.64        |
| Diabetes                                     | 232 (27.6%)             | 10 (19.6%)                | 0.28        |
| Previous Stroke                              | 111 (13.2%)             | 9 (17.6%)                 | 0.49        |
| Coronary artery disease                      | 24 (10.0%)              | 20 (7.9%)                 | 0.51        |
| Previous cerebral<br>bleeding                | 6 (2.5%)                | 2 (0.8%)                  | 0.25        |
| Previous GI bleeding                         | 1 (0.4%)                | 3 (1.2%)                  | 0.65        |
| CHA <sub>2</sub> DS <sub>2</sub> -Vasc score |                         |                           |             |
| Mean score                                   | 3.7 (1.4)               | 3.8 (1.4)                 | 0.76        |
| 7-9                                          | 33 (3.9%)               | 4 (7.8%)                  | 0.63        |
| 4-6                                          | 403 (47.9%)             | 23 (45.1%)                |             |
| 3                                            | 241 (28.7%)             | 15 (29.4%)                |             |
| 2                                            | 164 (19.5%)             | 9 (17.6%)                 |             |

|                               |             |             |       |
|-------------------------------|-------------|-------------|-------|
| mHAS_BLED score               | 2 (1-2)     | 2 (1-2)     | 0.94  |
| <b>Echocardiographic data</b> |             |             |       |
| LVDD, cm                      | 4.8 (0.7)   | 4.6 (0.6)   | 0.13  |
| LVEF, %                       | 60.4 (14.1) | 63.7 (10.4) | 0.13  |
| Left atrium diameter, cm      | 4.4 (0.8)   | 4.4 (0.8)   | 0.44  |
| <b>Medications</b>            |             |             |       |
| DOAC                          | 692 (82.3%) | 38 (74.5%)  | 0.23  |
| Warfarin                      | 149 (17.7%) | 13 (25.5%)  |       |
| Antiplatelet therapy          | 176 (20.9%) | 10 (19.6%)  | 0.96  |
| β-blocker                     | 524 (62.3%) | 33 (64.7%)  | 0.85  |
| ACE-I/ARB                     | 432 (51.4%) | 20 (39.2%)  | 0.12  |
| Ca-blocker                    | 404 (48.0%) | 22 (43.1%)  | 0.59  |
| Digoxin                       | 91 (10.8%)  | 6 (11.8%)   | >0.99 |
| <b>AFEQT-OS score</b>         |             |             |       |
| <b>Baseline</b>               |             |             |       |
| Overall summary               | 78.9 (16.7) | 78.2 (15.0) | 0.76  |
| Symptoms                      | 83.9 (17.3) | 83.7 (14.4) | 0.92  |
| Daily activities              | 75.0 (21.9) | 72.2 (20.4) | 0.38  |
| Treatment satisfactions       | 71.6 (18.6) | 71.4 (17.8) | 0.94  |
| Treatment concerns            | 80.7 (17.5) | 81.7 (16.9) | 0.68  |
| <b>1-year</b>                 |             |             |       |
| Overall summary               | 81.9 (15.0) | 82.8 (17.2) | 0.72  |
| Symptoms                      | 87.5 (13.6) | 90.8 (12.1) | 0.13  |
| Daily activities              | 77.1 (20.7) | 76.0 (23.9) | 0.76  |
| Treatment satisfactions       | 74.1 (17.0) | 76.4 (18.6) | 0.44  |
| Treatment concerns            | 84.3 (14.7) | 86.2 (16.2) | 0.42  |

Values are mean (SD), median (IQR), or n (%). ACE-I, angiotensin converting enzyme inhibitor; AF, atrial fibrillation; AFEQT, Atrial Fibrillation Effect on Quality-of-Life; ARB, angiotensin receptor blocker; BNP, brain natriuretic peptide; DOAC, direct oral anticoagulant; eGFR, estimated glomerular filtration rate; GI, gastrointestinal; LVDD, left ventricular end-diastolic dimension; LVEF, left ventricular ejection fraction; mHAS-BLED; modified HAS-BLED.



**Table S4. Crude incidence of adverse clinical events during 2 years after registration**

|                 | OAC continuation | OAC discontinuation |
|-----------------|------------------|---------------------|
| All-cause death | 26 (2.0%)        | 11 (2.8%)           |
| Stroke/TIA      | 13 (1.0%)        | 4 (1.0%)            |
| Bleeding        | 39 (3.1%)        | 10 (2.5%)           |

OAC, oral anticoagulant; TIA transient ischemic attack.

**Table S5. Association OAC discontinuation and clinical adverse events during 2 years after registration**

| Outcomes        | Hazard ratio (95% confidence interval) | P-value |
|-----------------|----------------------------------------|---------|
| All-cause death | 1.03 (0.29-3.67)                       | 0.96    |
| Stroke/TIA      | 0.95 (0.26-3.39)                       | 0.93    |
| Bleeding        | 0.90 (0.44-1.84)                       | 0.78    |

OAC, oral anticoagulant; TIA transient ischemic attack.
